# Estimation of Individual Probabilities of COVID-19 Infection, Hospitalization, and Death From A County-level Contact of Unknown infection Status

Rajiv Bhatia MD, MPH \*

Assistant Professor of Medicine (affiliated), Stanford University

Physician, VA Palo Alto Health Care System

[drajiv@stanford.edu](mailto:drajiv@stanford.edu)

Jeffrey Klausner, MD, MPH

Professor of Medicine and Public Health, UCLA

[JDKlausner@mednet.ucla.edu](mailto:JDKlausner@mednet.ucla.edu)

Abstract: - 230 words

Manuscript: 2747 words

References: 822 words

Tables: 3

Figures: 2

\* Corresponding Author

**Version Date: June 23, 2020**

## Abstract

**Objective:** Our objective is to demonstrate a method to estimate the probability of a laboratory confirmed COVID19 infection, hospitalization, and death arising from a contact with an individual of unknown infection status.

**Methods:** We calculate the probability of a confirmed infection, hospitalization, and death resulting from a county-level person-contact using available data on current case incidence, secondary attack rates, infectious periods, asymptomatic infections, and ratios of confirmed infections to hospitalizations and fatalities.

**Results:** Among US counties with populations greater than 500,000 people, during the week ending June 13,2020, the median estimate of the county level probability of a confirmed infection is 1 infection in 40,500 person contacts (Range: 10,100 to 586,000). For a 50 to 64 year-old individual, the median estimate of the county level probability of a hospitalization is 1 in 709,000 person contacts (Range: 177,000 to 10,200,000) and the median estimate of the county level probability of a fatality is 1 in 6,670,000 person contacts (Range 1,680,000 to 97,600.000).

**Conclusions and Relevance:** Estimates of the individual probabilities of COVID19 infection, hospitalization and death vary widely but may not align with public risk perceptions. Systematically collected and publicly reported data on infection incidence by, for example, the setting of exposure, type of residence and occupation would allow more precise estimates of probabilities than possible with currently available public data. Calculation of secondary attack rates by setting and better measures of the prevalence of seropositivity would further improve those estimates.

## Introduction

During infectious disease epidemics, human perception of risk modifies disease transmission, and motivates, or not, protective behaviors such as hand hygiene, wearing masks and social distancing at the individual level and quarantine, travel restrictions, and restrictions on gatherings at the societal level. Novel infectious agents such as the COVID-19 virus, with immature understanding of susceptibility, transmission, and lethality, challenge accurate risk estimation.

Predictive models, government surveillance, and epidemiological studies have characterized the risk of COVID-19, in terms of aggregate, and not individual, outcomes, primarily including County-level counts of reported infections, hospitalizations, and deaths. (1) Research has attempted to estimate case fatality rates and identified risk factors for adverse outcomes from COVID-19 disease, such age and chronic disease status. (2, 3) We are not aware of any published research that estimates individual level probabilities of infection, hospitalization, and death from exposure in the general community.

In the United States, publicly accessible data does not yet permit estimating the individual risks of COVID-19 transmission in specific exposure settings, including workplaces, prisons, nursing homes, hospitals and group residential housing settings. However, a starting point for estimation can be the average individual-level probability of acquiring infection across all settings at the level of a county. One can modify those

estimates as data on setting specific infection incidence rates, susceptibility and secondary attack rates permit.

Here, we contribute to COVID-19 risk assessment by demonstrating a method to estimate the individual probabilities of acquiring infection, being hospitalized, and dying in U.S. Counties. We identify areas of available and future knowledge that could make risk assessment more precise and context specific.

## Materials and Methods

Our objective is to estimate the probability of acquiring COVID-19 infection from a “contact” with a random individual of unknown infection status. We conceptualize this probability under steady state conditions (e.g. no epidemic growth or decline) as a function of individual susceptibility, the current reported case incidence, accounting for undetected infection, the share of infection transmission occurring without a known contact, the chance of transmission per contact (e.g., the secondary attack rate), and the duration of infectiousness, accounting for pre-symptomatic transmission.

We use the formulae below to compute probabilities of infection, confirmed infection, hospitalization, and death.

$$(1) P_{infection | contact} = S I_{confirmed} C \beta [1 + \alpha / (1 - \alpha)] [\sigma D_{Infectious} + \eta (1 - \sigma) D_{Infectious}]$$

$$(2) P_{confirmed-infection | contact} = P_{infection | contact} / (1 - \alpha)$$

$$(3) P_{hospitalization | contact} = CHR \times P_{confirmed-infection | contact}$$

$$(4) P_{\text{death} | \text{contact}} = CFR \times P_{\text{confirmed-infection} | \text{contact}}$$

We describe the parameters used in Table 1 and explain their sources below.

**Table 1. Parameters Used in Formulae**

| Symbol                  | Parameter Description                                                  | Value       |
|-------------------------|------------------------------------------------------------------------|-------------|
| $S$                     | Proportion of the population susceptible                               | 95%         |
| $I_{\text{confirmed}}$  | Incidence of confirmed (reported) infections per day                   | County Data |
| $C$                     | Proportion of infections resulting from unknown contacts               | 100%        |
| $\alpha$                | Proportion of total infections unconfirmed (undetected and unreported) | 75%         |
| $B$                     | Probability of infection per exposure                                  | 10%         |
| $D_{\text{infectious}}$ | Average days infectious per infection                                  | 8           |
| $\sigma$                | Proportion of infectious period pre-symptomatic <sup>a</sup>           | 40%         |
| $\eta$                  | Proportion non-compliant with isolation                                | 25%         |
| $CHR$                   | Case Hospitalization Ratio, 0 to 49 years <sup>a</sup>                 | 0.026       |
| $CHR$                   | Case Hospitalization Ratio, 50 to 64 years <sup>a</sup>                | 0.057       |
| $CHR$                   | Case Hospitalization Ratio, Over 65 years <sup>a</sup>                 | 0.1         |
| $CFR$                   | Case Fatality Ratio, 0 to 49 years <sup>a</sup>                        | 0.001       |
| $CFR$                   | Case Fatality Ratio, 50 to 64 years <sup>a</sup>                       | 0.006       |
| $CFR$                   | Case Fatality Ratio, Over 65 years <sup>a</sup>                        | 0.032       |

<sup>a</sup> US CDC COVID-19 Pandemic Planning Scenarios. Scenario 4 Estimates

The prevalence of susceptibility to COVID-19 is unknown. Pre-existing immunity due to previous COVID-19-related coronaviral infections is plausible but speculative. Reliable estimates for the proportion of the population who have acquired immunity is unknown but non-zero. We have conservatively estimated the prevalence of susceptibility to be 95%.

We acquired COVID-19 confirmed infection incidence data from publicly reported statistics compiled by The New York Times. (4) Confirmed infection rates underestimate the true incidence of infection in the community because of undetected infections that can be both symptomatic and asymptomatic. Several studies have estimated the asymptomatic fraction. (5-7) In one meta-analytic review, the proportion of asymptomatic infections ranged from 6% to 41%. (8) A weighted mean estimate from those studies suggests that about 1 out of 6 persons, or 16%, may be asymptomatic. On the other hand, seroprevalence studies aim to capture both the confirmed and unconfirmed fractions together without regard to symptoms. Some seroprevalence studies suggest that up to 90% of infections may be unconfirmed. (9) The US CDC gives 50% as their most conservative estimate of the proportion of asymptomatic infections. (10) We estimate 75% of all infections are unconfirmed which includes both symptomatic and asymptomatic unconfirmed infections.

Limited data is available on the share of reported infections arising without a known contact. As of this date, the US CDC has not included any statistics on this attribute of

confirmed infections. The State of Oregon currently publicly reports infections without a known contact a varying between 30 and 50%%. Because of limited national data, we use 100% for this parameter; we leave the parameter in the equation for the purpose of future applications.

The attack rate for an exposure varies by exposure intensity, context, proximity, and duration. For this analysis, contact means any substantive exposures that happen in a community, household, workplaces, or group living situations. Examples of substantive contacts outside households might include dining with a friend or business contact, working in a shared office space or having close or physical contact without the types of precautions now recommended for prevention of infection transmission (e.g. avoiding handshaking, embraces, wearing a mask or indoor ventilation). We do not consider contacts to be short-term events, such as passing by a person on the street. Contact within households involves habitual and typically unprotected close physical. We understand that attack rates will vary across such diverse exposure settings.

Overall, secondary attack rates from contact tracing studies on COVID-19 range from 0.7% to 16.3%. One study in Taiwan estimated a mean attack rate of 0.7% with an attack rate of ~5% among household and non-household family contacts. (11) A Hong Kong study of the quarantined contacts of visitors from China estimated a secondary attack rate of 11.7%. (12) Two published study within China found a household attack rate of 16.3% and 11.2% respectively. (13-14)

We assume an average plausible attack rate across all settings of exposure based on these range of estimates to be 10% in the absence of more setting and activity specific data. We acknowledge that this estimate may overestimate the attack rate for a non-household contact and underestimate it for a household contact.

We estimate the total duration of infectiousness as 8 days. Research suggests that individuals who develop symptoms may be infectious two to three days before the onset of symptoms. (15) We apply the US CDC's estimates that the proportion of infectiousness before symptom onset is 40% of the total duration. (10) Conservatively, we treat infections in the unreported fraction as being infectious for the same duration as those with reported infections.

Compliance with self-isolation affects the number of infectious people circulating with infection after symptoms develop. Current research within the context of the COVID-19 pandemic finds that compliance with isolation ranges from 57% without financial compensation to 94% with compensation. (16) Given the current US context and the availability of sick leave compensation, we assume that 75% of individuals with confirmed infection will voluntarily self-isolate after symptoms develop. We do not alter the duration of infectiousness for the unconfirmed fraction of infections.

We estimate the probabilities per contact of reported infections, hospitalizations and deaths as fixed ratios of the estimated but unobserved probability of infection. The



relationship between total infections and confirmed infections is fixed and defined by the parameter alpha above.

We estimate the probability of hospitalizations and deaths per contact using US CDC estimates of case hospitalization ratios and case fatality ratios from their pandemic planning scenario four, which is their most conservative current estimate of disease severity and transmissibility. (10) (Table 1) Based on these fixed ratios, we expect 18 reported infections and 70 total infections for every hospitalization in an individual in the 50-64 year old age group. And we expect 167 reported infections, and 667 total infections for every death in the 50-64 year old age group.

These estimated case fatality ratios are within the range of published values in the United States. One study of deaths through the early part of the epidemic estimated the case fatality ratio for symptomatic cases to be 1.3% (95% CI: 0.6% to 2.1%). (2)

We compared estimated weekly hospitalization incidence rates produced using the estimated probabilities per contact against observed incidence rates of laboratory confirmed COVID-19 hospitalization in several US multi-county regions where the US CDC conducts active hospital case surveillance. (17) To estimate weekly hospitalizations, we multiplied our estimates of age specific probabilities of hospitalization per contact and a modest number of daily contacts equal to the number of other household members plus one.

## Results

Among US Counties with populations greater than 500,000 people (N= 1224), for the week ending June 13, 2020, the median observed county-level daily case incidence is 6.78 per 100,000 (Range, 0.41- 24). In those counties, the median estimate of the county-level probability of a confirmed COVID-19 infection is 1 infection in 40,500 person-contacts (Range: 10,100 - 586,000). These estimates reflect the probability per contact at a single point in time averaged across all types of contacts and settings, within and outside households.

In the same counties, for a 50 to 64 year old individual, , the median estimate of the county-level probability of a hospitalization is 1 in 709,000 person-contacts (Range: 177,000 – 10,200,000) and the median estimate of the county-level probability of a fatality is 1 in 6,670,000 person-contacts (Range 1,680,000 – 97,600.000). Table 2 lists probabilities for other age groups.

Table 2. Estimated County-level Probabilities for the Week Ending June 13, 2020 of COVID-19 Events in Counties with Populations Greater Than 500,000 (N = 1224)

| Event           | Age Group   | Average   | Median    | Minimum   | Maximum   |
|-----------------|-------------|-----------|-----------|-----------|-----------|
| Confirmed Case  | All         | 0.002833% | 0.002470% | 0.000171% | 0.009892% |
| Hospitalization | Under 49 yr | 0.000074% | 0.000064% | 0.000004% | 0.000257% |
|                 | 50- 64 yr   | 0.000162% | 0.000141% | 0.000010% | 0.000564% |
|                 | Over 65 yr  | 0.000283% | 0.000247% | 0.000017% | 0.000989% |
| Fatality        | Under 49 yr | 0.000003% | 0.000002% | 0.000000% | 0.000010% |
|                 | 50- 64 yr   | 0.000017% | 0.000015% | 0.000001% | 0.000059% |
|                 | Over 65 yr  | 0.000091% | 0.000079% | 0.000005% | 0.000317% |

Figure 1 illustrates the average estimated probabilities of confirmed infection, hospitalization and fatality per contact as a function of daily case incidence. Figure 2 illustrates the estimated number of hospitalizations and fatalities per 1 million contacts in a subset of analyzed US counties with populations greater than 1.5 million.

We found good concordance between the estimated weekly hospitalization rates and rates from US CDC hospitalization surveillance data in most of our comparison regions under the assumption that average daily contacts equaled the average number of other household members plus one. (Table 3) CDC acknowledges that more recent data values are subject to revision.

Table 3. Estimated weekly hospitalization rates per 100,000 people for the week ending June 13, 2020 compared to weekly laboratory confirmed hospitalization rates observed by US CDC regional surveillance.

| County                                                     | Alameda, CA | Denver CO | Fulton GA | Montgomery, MD | Wayne, MI |
|------------------------------------------------------------|-------------|-----------|-----------|----------------|-----------|
| Assumption of Contacts Per Day                             | 2.8         | 2.3       | 2.47      | 2.79           | 2.52      |
| Estimated Weekly New Cases per 100,000                     | 32.94       | 37.55     | 28.2      | 127.4          | 53.8      |
| Estimated Weekly Hospitalization Rate (per 100,000 people) |             |           |           |                |           |
| 18-49 years                                                | 0.86        | 0.98      | 0.7       | 3.3            | 1.4       |
| 50-64 years                                                | 1.88        | 2.14      | 1.6       | 7.3            | 3.1       |
| Over 65 years                                              | 3.29        | 3.76      | 2.8       | 12.7           | 5.4       |
| COVID-NET Observed Regional Weekly Hospitalization Rates   |             |           |           |                |           |
| 18-49 years                                                | 1           | 1.1       | 1         | 5.3            | 0.4       |
| 50-64 years                                                | 1           | 3.2       | 2         | 6.6            | 0.8       |
| Over 65 years                                              | 3.3         | 2.2       | 1.7       | 13.5           | 0.5       |

## Discussion

We demonstrate a method to estimate the average county-level probabilities of COVID-19 confirmed infections, hospitalizations, and deaths in the U.S resulting from a contact with a random person in the population. Those estimates reflect current reported COVID-19 confirmed infection incidence in US counties with more than 500,000 people for the week ending June 6, 2020. Probabilities vary across a wide range reflecting the varying case incidences in different counties.

229  
230 Our method is limited by the availability of publicly available data on infection  
231 transmission on COVID-19, including setting and occupational specific case incidence  
232 rates, data on antibody seroprevalence, the share of infection with known contacts, and  
233 activity-specific attack rates. The estimates therefore reflect the average probability  
234 across a wide range of exposure contexts. Nevertheless, observed rates of  
235 hospitalization for laboratory confirmed COVID-19 disease in several US CDC active  
236 surveillance areas generally corroborate our estimates under the assumption of a  
237 modest level of social contact.

238  
239 Our estimates of the average probabilities per contact do not accurately estimate risks  
240 for specific subsets of people. Infections occur within geographically and socially  
241 constrained chains of transmission, for example, within clusters of related or socially  
242 connected individuals or among those living in congregate living facilities such as  
243 nursing homes. Clusters of COVID-19 infections have been reported associated with  
244 prisons, workers dormitories, religious services, nightclubs, schools, cruise ships,  
245 sporting events, and professional conferences. (18) Disaggregating confirmed infection  
246 incidence rates into fractions representing those with and without known contacts and  
247 those within and without congregate living settings would allow for more setting and  
248 population specific risk estimates. This requires the systematic public reporting of  
249 confirmed infection exposure factors.

250

As mentioned above, systematic data on the share of confirmed infections arising without a known contact is not currently available. Applying this fraction to the model would reduce our estimates based on the assumption of a 100% share.

Available estimates of the secondary attack rate come from observations outside the US and at an earlier time period in the pandemic, prior to normalization of behaviors that reduce the risk of infection transmission, such as increased hand washing, observing physical distance, forgoing physical greetings, and wearing masks.

The limitations of published secondary attack rates and the lack of disaggregated data on confirmed infection incidence also do not allow our estimates to differentiate between community and household transmission. Most studies indicate that household attack rates are higher than for contacts in the community. Systematic public reporting of anonymized contact tracing data would provide information to assess context specific attack rates.

We also cannot account for intra-individual variation in the secondary attack rate within a setting. With respiratory viruses, the number of secondary cases generated by each index case can vary significantly. (19-20) One recent estimate suggests that 80% of COVID-19 infections are due to a small fraction (10%) of particularly infectious individuals. (21)

We have assumed a high fraction of the population remains susceptible as the prevalence and significance of antibodies to COVID-19 is not known. However, there may well be factors conferring protection to infection or responsible for differences in susceptibility. For example, cross immunity due to infection with other coronaviruses may be occurring. (22) Researchers have also observed cellular immune system responses to COVID-19 among unexposed individuals likely due to prior exposure to related coronaviruses. (23) More data will be required before adjusting risk assessment for population susceptibility or immunity.

We estimated probabilities of hospitalization and death based on CDC estimates of disease severity. We chose conservative scenarios but acknowledge that estimates of confirmed infection fatality ratios may further evolve over the course of the pandemic. Furthermore, individual states may have different criteria for recording a death from COVID-19. The risk of hospitalization and death varies with other risk factors including race/ethnicity, level of deprivation, and chronic diseases such as lung disease and diabetes, that are not reflected in our analysis.

Better data to address the above limitations would likely reduce estimated probabilities of adverse events for a large fraction of the population; still, the estimated probabilities reported here may appear considerably lower than those reflected in public opinion surveys. Scientific uncertainties, media attention, dramatic governmental action and a subjective perceived lack of control over exposure all may be influencing risk perception. Exploring methods to communicate risk and the concordance of perceived risk and risk probabilities would be an appropriate subject for further work.

297  
 298 Avoiding human contact in the setting of an uncertain and lethal epidemic threat is an  
 299 expected and self-protective human behavior. Prevalent beliefs today about the sources  
 300 of COVID-19 infection include ‘contact with infected persons’, ‘people coming from  
 301 abroad’ or ‘foreign nationals.’ (24) Notably, many people assume that contact with a  
 302 family member has a lower risk of infection transmission than contact with a stranger.  
 303 This may not be true for all subgroups in the population.

304  
 305 In the US, policy makers have taken dramatic and unprecedented steps to control  
 306 COVID-19, applying universal contact reductions through home confinement, limits on  
 307 travel, closures of schools and businesses and limits on gatherings. While heightened  
 308 perception of risk (e.g., fear) motivated these restrictions at the outset of the epidemic,  
 309 ongoing restrictions on community activity may be mediating risk perceptions. (25)

310  
 311 Notably, in Wuhan, the government limited exponential growth of the COVID-19  
 312 epidemic using isolation and quarantine, mandatory mask wearing, canceled New  
 313 Year’s celebrations, the curtailment of intra-city and intercity transportation and  
 314 extension of the New Year’s holiday period. (26) South Korea achieved epidemic control  
 315 with scaled up testing, strong contact notification practices, case isolation and strict  
 316 quarantine of those exposed and public awareness. (27) The lack of understanding of  
 317 how various countries have brought their epidemics under control maybe another  
 318 important factor influencing the perception of risk to COVID-19 infection in community  
 319 settings in the US.

320



Return to community workplace and social life will require individuals to be comfortable with their personal risk of acquiring COVID-19 infection. Estimates on the individual probabilities of infection, hospitalization and death may contribute to a more accurate risk perception. Systematically collected and publicly reported data on infection incidence by, for example, the geographic setting of exposure, residence type, whether a case had a known exposure, and would allow more precise estimation than those possible with currently available public data. Calculation of secondary attack rates by setting and prevalence of seropositivity would further improve these estimates.

**Contributions:** Rajiv Bhatia and Jeffrey Klausner equally contributed to the design of the study and writing of the manuscript. Rajiv Bhatia conducted the analysis.

**Conflicts of interest:** None

**Funding:** None

## References

1. Centers for Disease Control and Prevention. Covid-19 Forecasts. URL: <https://www.cdc.gov/coronavirus/2019-ncov/covid-data/forecasting-us.html> Accessed May 24, 2020.
2. Basu A. Estimating The Infection Fatality Rate Among Symptomatic COVID-19 Cases In The United States [published online ahead of print, 2020 May 7]. *Health Aff (Millwood)*. 2020. doi:10.1377/hlthaff.2020.00455
3. Zheng Z, Peng F, Xu B, et al. Risk factors of critical & mortal COVID-19 cases: A systematic literature review and meta-analysis [published online ahead of print, 2020 Apr 23]. *J Infect*. 2020; S0163-4453(20)30234-6. doi:10.1016/j.jinf.2020.04.021
4. On ongoing repository of data on coronavirus cases and deaths in the U.S. New York Times. <https://github.com/nytimes/covid-19-data> Accessed: June 1, 2020.
5. Furukawa NW, Brooks JT, Sobel J. Evidence supporting transmission of severe acute respiratory syndrome coronavirus 2 while pre-symptomatic or asymptomatic. *Emerg Infect Dis*. 2020 Jul. <https://doi.org/10.3201/eid2607.201595>
6. He, X., Lau, E.H.Y., Wu, P. et al. Temporal dynamics in viral shedding and transmissibility of COVID-19. *Nat Med* 26, 672–675 (2020). doi.org/10.1038/s41591-020-0869-0
7. Wei WE, Li Z, Chiew CJ, Yong SE, Toh MP, Lee VJ. Presymptomatic Transmission of SARS-CoV-2 - Singapore, January 23-March 16, 2020. *MMWR Morb Mortal Wkly Rep*. 2020;69(14):411-415. Published 2020 Apr 10. doi:10.15585/mmwr.mm6914e1

8. Byambasuren O, Cardona M, Bell K, Clark J, McLaws ML, Glasziou P. Estimating the extent of true asymptomatic COVID-19 and its potential for community transmission: systematic review and meta-analysis. medRxiv. doi.org/10.1101/2020.05.10.20097543
9. Sood N, Simon P, Ebner P, et al. Seroprevalence of SARS-CoV-2-Specific Antibodies Among Adults in Los Angeles County, California, on April 10-11, 2020 [published online ahead of print, 2020 May 18]. . 2020;e208279. doi:10.1001/jama.2020.8279US
10. Centers for Disease Control. Covid-19 Pandemic Planning Scenarios. URL: <https://www.cdc.gov/coronavirus/2019-ncov/hcp/planning-scenarios.html> Accessed May 29, 2020.
11. Cheng HY, Jian SW, Liu DP, et al. Contact Tracing Assessment of COVID-19 Transmission Dynamics in Taiwan and Risk at Different Exposure Periods Before and After Symptom Onset [published online ahead of print, 2020 May 1]. *JAMA Intern Med.* 2020;e202020. doi:10.1001/jamainternmed.2020.2020
12. Kwok KO, Wong VWY, Wei WI, Wong SYS, Tang JW. Epidemiological characteristics of the first 53 laboratory-confirmed cases of COVID-19 epidemic in Hong Kong, 13 February 2020. *Euro Surveill.* 2020;25(16). doi:10.2807/1560-7917.ES.2020.25.16.2000155
13. Wei Li, Bo Zhang, Jianhua Lu, Shihua Liu, Zhiqiang Chang, Peng Cao, Xinhua Liu, Peng Zhang, Yan Ling, Kaixiong Tao, Jianying Chen, The characteristics of household transmission of COVID-19, *Clinical Infectious Diseases.* doi.org/10.1093/cid/ciaa450

- 380 14. Bi Q, Wu Y, Mei S, et al. Epidemiology and transmission of COVID-19 in 391  
381 cases and 1286 of their close contacts in Shenzhen, China: a retrospective cohort study  
382 [published online ahead of print, 2020 Apr 27]. *Lancet Infect Dis*. 2020;S1473-  
383 3099(20)30287-5. doi:10.1016/S1473-3099(20)30287-5
- 384 15. Lauer SA, Grantz KH, Bi Q, et al. The Incubation Period of Coronavirus Disease  
385 2019 (COVID-19) From Publicly Reported Confirmed Cases: Estimation and  
386 Application. *Ann Intern Med*. 2020;172(9):577-582. doi:10.7326/M20-0504
- 387 16. Bodas M, Peleg K. Self-Isolation Compliance In The COVID-19 Era Influenced  
388 By Compensation: Findings From A Recent Survey In Israel [published online ahead of  
389 print, 2020 Apr 9]. *Health Aff (Millwood)*. 2020;101377hlthaff202000382.  
390 doi:10.1377/hlthaff.2020.00382
- 391 17. US CDC. Laboratory-confirmed Covid-19- Associated Hospitalizations. URL:  
392 [https://gis.cdc.gov/grasp/COVIDNet/COVID19\\_3.html](https://gis.cdc.gov/grasp/COVIDNet/COVID19_3.html) Accessed June 2, 2020.
- 393 18. Leclerc QJ, Fuller NM, Knight LE et al. What settings have been linked to SARS-  
394 CoV-2 transmission clusters? Wellcome Open Res 2020, 5:83  
395 doi.org/10.12688/wellcomeopenres.15889.1
- 396 19. Lipsitch M, Cohen T, Cooper B, et al. Transmission dynamics and control of  
397 severe acute respiratory syndrome. *Science*. 2003;300(5627):1966-1970.  
398 doi:10.1126/science.1086616
- 399 20. Lloyd-Smith, J., Schreiber, S., Kopp, P. et al. Superspreading and the effect of  
400 individual variation on disease emergence. *Nature* 438, 355–359 (2005).  
401 <https://doi.org/10.1038/nature04153>

21. Endo A, Centre for the Mathematical Modelling of Infectious Diseases COVID-19 Working Group, Abbott S et al. Estimating the overdispersion in COVID-19 transmission using outbreak sizes outside China [version 1; peer review: 1 approved]. Wellcome Open Res 2020, 5:67 doi.org/10.12688/wellcomeopenres.15842.1
22. Kissler SM, Tedijanto C, Goldstein E, Grad YH, Lipsitch M. Projecting the transmission dynamics of SARS-CoV-2 through the postpandemic period. Science. 2020;368(6493):860-868. doi:10.1126/science.abb5793
23. Grifoni, A., Weiskopf, D., Ramirez, S.I., Mateus, J., Dan, J.M., Moderbacher, C.R., Rawlings, S.A., Sutherland, A., Premkumar, L., Jadi, R.S., Marrama, D., de Silva, A.M., Frazier, A., Carlin, A., Greenbaum, J.A., Peters, B., Krammer, F., Smith, D.M., Crotty, S., Sette, A., Targets of T cell responses to SARS-CoV-2 coronavirus in humans with COVID-19 disease and unexposed individuals, *Cell* (2020). doi.org/10.1016/j.cell.2020.05.015.
24. Lohiniva AL, Sane J, Sibenberg K, Puumalainen T, Salminen M. Understanding coronavirus disease (COVID-19) risk perceptions among the public to enhance risk communication efforts: a practical approach for outbreaks, Finland, February 2020. *Euro Surveill.* 2020;25(13):2000317. doi:10.2807/1560-7917.ES.2020.25.13.2000317
25. Economic Attitudes as the Country Starts to Re-open. The Associated Press-NORC Center for Public Affairs Research. URL: <http://www.apnorc.org/projects/Pages/Economic-Attitudes-as-the-Country-Starts-to-Reopen.aspx> Accessed: May 25, 2020.

- 424 26. Pan A, Liu L, Wang C, et al. Association of Public Health Interventions With the  
425 Epidemiology of the COVID-19 Outbreak in Wuhan, China [published online ahead of  
426 print, 2020 Apr 10]. *JAMA*. 2020;323(19):1-9. doi:10.1001/jama.2020.6130
- 427 27. Ryu S, Ali ST, Jang C, Kim B, Cowling BJ. Effect of non-pharmaceutical  
428 interventions on transmission of severe acute respiratory syndrome coronavirus 2,  
429 South Korea, 2020. *Emerg Infect Dis*. 2020 Oct. doi.org/10.3201/eid2610.201886

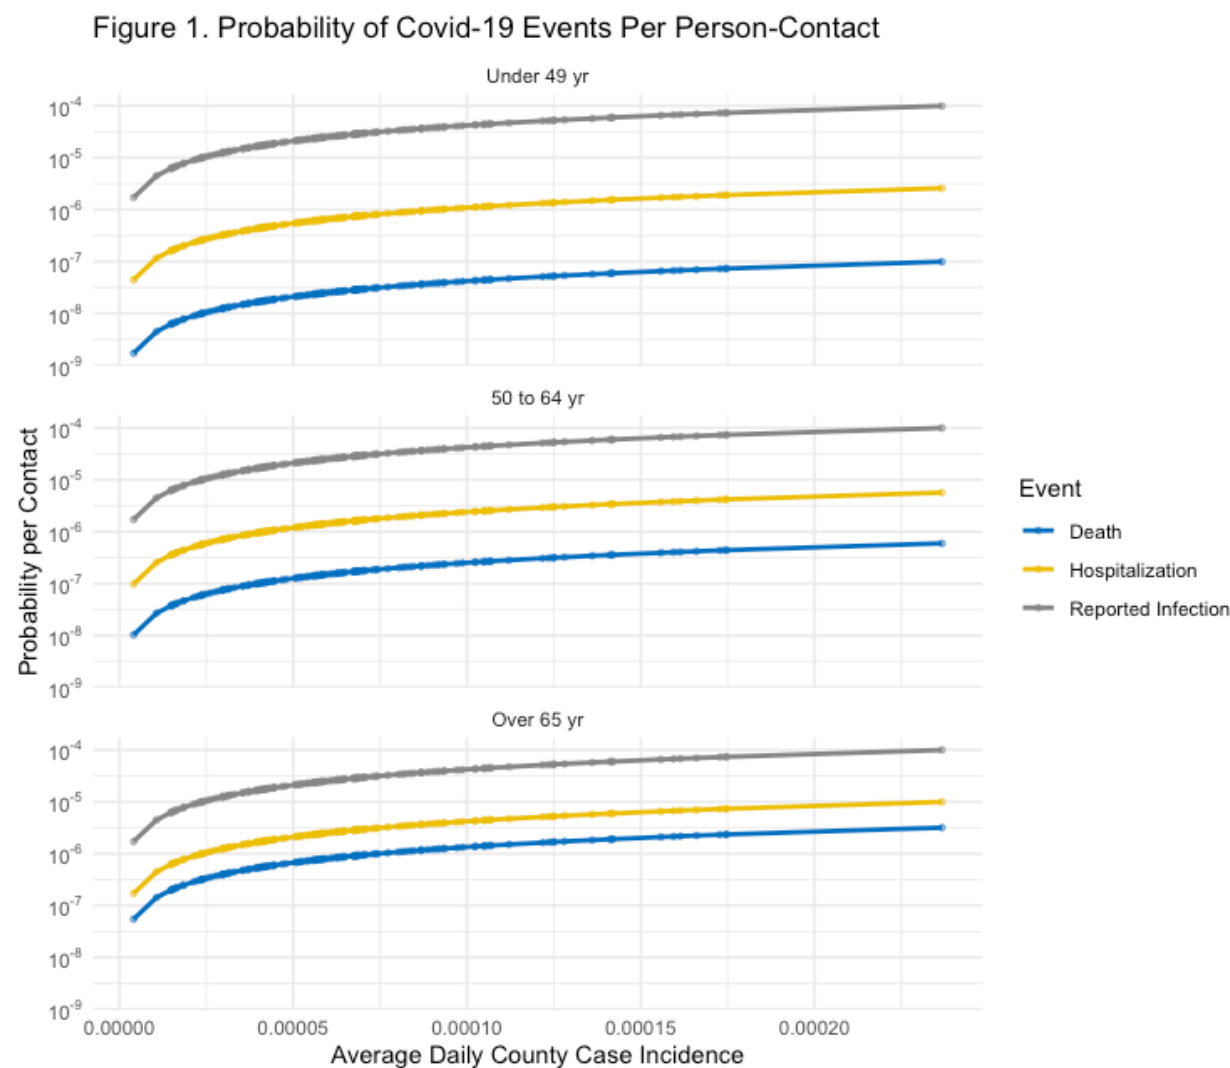

Figure 1. Estimated county-level probabilities of confirmed infection, hospitalization and death per contact as a function of daily case incidence.

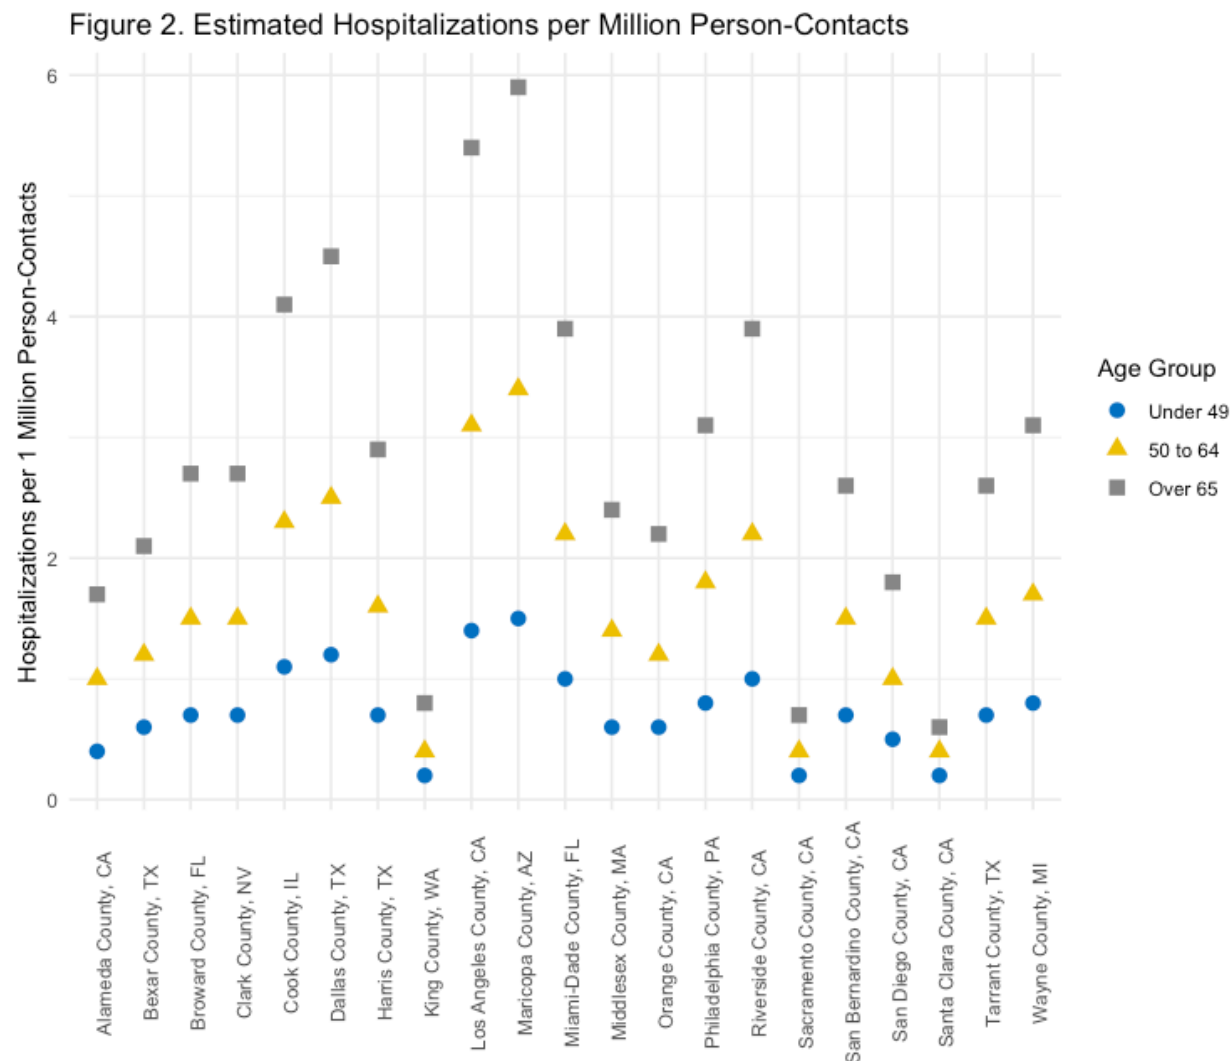

Figure 2. Estimated current number of predicted COVID-19 hospitalizations per 1 million contacts in counties with populations greater than 1.5 million.
