# Supplementary material for: Estimating individual risks of COVID-19-associated hospitalization and death using publicly available data
Source: bioRxiv or medRxiv preprint supplement (doi:10.1101/2020.06.06.20124446), 2020-11-17
Supplement: Supplementary file [file 2020.06.06.20124446-1.pdf]

**eTable 1. Comparison of Estimated Hospitalization Rates Against Laboratory Confirmed Covid-19 Hospitalization Rates from the US CDC COVID-NET Surveillance Program**

| <b>County</b>                                    | <b>Alameda</b> | <b>Denver</b> | <b>Wayne</b> | <b>Montgomery</b> | <b>Fulton</b> |
|--------------------------------------------------|----------------|---------------|--------------|-------------------|---------------|
| Average daily case incidence                     | 4.08E-05       | 9.91E-05      | 5.02E-05     | 2.10E-04          | 6.09E-05      |
| Est. Prob. Hospitalization per Contact, 50-64 y  | 8.08E-07       | 1.96E-06      | 9.94E-07     | 4.16E-06          | 1.21E-06      |
| Estimated Average Contacts / Day                 | 2.8            | 2.3           | 2.52         | 2.79              | 2.47          |
| Estimated weekly hospitalization rate /100,000   | 1.58           | 3.16          | 1.75         | 8.12              | 2.08          |
| Confirmed weekly hospitalizations rate / 100,000 | 1.4            | 2.8           | 1.7          | 15.6              | 1.2           |
